# Supplementary material for: Exploring the C-X…π Halogen Bonding Motif: An Infrared and Raman Study of the Complexes of CF3X (X = Cl, Br and I) with the Aromatic Model Compounds Benzene and Toluene
Source: Molecules. 2013 Jun 10;18(6):6829–51. doi: 10.3390/molecules18066829 (PMC6270472; doi:10.3390/molecules18066829)
Supplement: Supplementary file 1 [file molecules-18-06829-s001.pdf]

# Supplementary Materials

**Table S1.** MP2/aug-cc-pVDZ vibrational frequencies, in  $\text{cm}^{-1}$ , and infrared intensities, in  $\text{km mol}^{-1}$ , for  $\text{CF}_3\text{Cl}\cdot\text{benzene}$ .

| Mode                          | $\nu_{\text{monomer}}$ | IR Intensity | $\nu_{\text{complex}}$ | IR Intensity | $\Delta\nu$ |
|-------------------------------|------------------------|--------------|------------------------|--------------|-------------|
| CF <sub>3</sub> Cl            |                        |              |                        |              |             |
| $\nu_1$ (A <sub>1</sub> )     | 1097.0                 | 469.7        | 1098.8                 | 558.7        | 1.8         |
| $\nu_2$ (A <sub>1</sub> )     | 765.0                  | 24.5         | 763.2                  | 21.0         | −1.8        |
| $\nu_3$ (A <sub>1</sub> )     | 480.3                  | 0.1          | 481.5                  | 1.1          | 1.2         |
| $\nu_4$ (E)                   | 1192.2                 | 282.1        | 1182.6                 | 214.4        | −9.6        |
| $\nu_5$ (E)                   | 546.0                  | 1.4          | 545.5                  | 1.4          | −0.5        |
| $\nu_6$ (E)                   | 347.2                  | 0.002        | 348.1                  | 0.01         | 0.9         |
| benzene                       |                        |              |                        |              |             |
| $\nu_1$ (A <sub>1g</sub> )    | 3238.7                 | 0.0          | 3239.1                 | 0.2          | 0.3         |
| $\nu_2$ (A <sub>1g</sub> )    | 1007.1                 | 0.0          | 1006.3                 | 1.0          | −0.8        |
| $\nu_3$ (A <sub>2g</sub> )    | 1322.6                 | 0.0          | 1321.9                 | 0.0          | −0.6        |
| $\nu_4$ (A <sub>2u</sub> )    | 678.4                  | 115.9        | 680.6                  | 128.7        | 2.2         |
| $\nu_5$ (B <sub>1u</sub> )    | 3202.1                 | 0.0          | 3202.9                 | 0.001        | 0.8         |
| $\nu_6$ (B <sub>1u</sub> )    | 969.6                  | 0.0          | 969.1                  | 0.0          | −0.5        |
| $\nu_7$ (B <sub>2g</sub> )    | 904.4                  | 0.0          | 904.5                  | 0.0004       | 0.1         |
| $\nu_8$ (B <sub>2g</sub> )    | 577.4                  | 0.0          | 573.4                  | 0.001        | −4.0        |
| $\nu_9$ (B <sub>2u</sub> )    | 1473.8                 | 0.0          | 1476.6                 | 0.003        | 2.8         |
| $\nu_{10}$ (B <sub>2u</sub> ) | 1155.3                 | 0.0          | 1155.4                 | 0.0          | 0.1         |
| $\nu_{11}$ (E <sub>1g</sub> ) | 845.5                  | 0.0          | 847.3                  | 0.2          | 1.8         |
| $\nu_{12}$ (E <sub>1u</sub> ) | 3229.1                 | 28.3         | 3229.6                 | 22.5         | 0.5         |
| $\nu_{13}$ (E <sub>1u</sub> ) | 1469.3                 | 5.4          | 1468.0                 | 6.6          | −1.3        |
| $\nu_{14}$ (E <sub>1u</sub> ) | 1052.0                 | 5.2          | 1051.5                 | 4.4          | −0.5        |
| $\nu_{15}$ (E <sub>2g</sub> ) | 3213.0                 | 0.0          | 3213.7                 | 0.003        | 0.8         |
| $\nu_{16}$ (E <sub>2g</sub> ) | 1624.5                 | 0.0          | 1622.5                 | 0.004        | −2.0        |
| $\nu_{17}$ (E <sub>2g</sub> ) | 1183.1                 | 0.0          | 1183.1                 | 49.4         | −0.1        |
| $\nu_{18}$ (E <sub>2g</sub> ) | 594.9                  | 0.0          | 594.2                  | 0.001        | −0.8        |
| $\nu_{19}$ (E <sub>2u</sub> ) | 927.1                  | 0.0          | 927.7                  | 0.004        | 0.7         |
| $\nu_{20}$ (E <sub>2u</sub> ) | 394.8                  | 0.0          | 393.8                  | 0.002        | −1.1        |

Notes: Van der Waals vibrations: 53.7  $\text{cm}^{-1}$ , 0.1  $\text{km mol}^{-1}$ ; 40.2  $\text{cm}^{-1}$ , 0.001  $\text{km mol}^{-1}$ ; 38.3  $\text{cm}^{-1}$ , 0.008  $\text{km mol}^{-1}$ ; 17.3  $\text{cm}^{-1}$ , 0.02  $\text{km mol}^{-1}$ ; 9.8  $\text{cm}^{-1}$ , 0.01  $\text{km mol}^{-1}$ ; 2.2  $\text{cm}^{-1}$ , 0.0002  $\text{km mol}^{-1}$ .

**Table S2.** MP2/aug-cc-pVDZ vibrational frequencies, in  $\text{cm}^{-1}$ , and infrared intensities, in  $\text{km mol}^{-1}$ , for  $\text{CF}_3\text{Br}\cdot\text{benzene}$ .

| Mode                          | $\nu_{\text{monomer}}$ | IR Intensity | $\nu_{\text{complex}}$ | IR Intensity | $\Delta\nu$ |
|-------------------------------|------------------------|--------------|------------------------|--------------|-------------|
| CF <sub>3</sub> Br            |                        |              |                        |              |             |
| $\nu_1$ (A <sub>1</sub> )     | 1078.6                 | 496.1        | 1080.0                 | 581.9        | 1.4         |
| $\nu_2$ (A <sub>1</sub> )     | 739.4                  | 29.7         | 736.7                  | 26.1         | -2.7        |
| $\nu_3$ (A <sub>1</sub> )     | 361.5                  | 0.04         | 360.4                  | 1.0          | -1.1        |
| $\nu_4$ (E)                   | 1178.8                 | 254.7        | 1169.8                 | 243.6        | -9.0        |
| $\nu_5$ (E)                   | 531.3                  | 0.9          | 530.5                  | 1.0          | -0.8        |
| $\nu_6$ (E)                   | 305.8                  | 0.01         | 306.3                  | 0.01         | 0.5         |
| benzene                       |                        |              |                        |              |             |
| $\nu_1$ (A <sub>1g</sub> )    | 3238.7                 | 0.0          | 3239.3                 | 0.4          | 0.6         |
| $\nu_2$ (A <sub>1g</sub> )    | 1007.1                 | 0.0          | 1005.9                 | 1.6          | -1.2        |
| $\nu_3$ (A <sub>2g</sub> )    | 1322.6                 | 0.0          | 1321.4                 | 0.0002       | -1.2        |
| $\nu_4$ (A <sub>2u</sub> )    | 678.4                  | 115.9        | 681.9                  | 133.4        | 3.5         |
| $\nu_5$ (B <sub>1u</sub> )    | 3202.1                 | 0.0          | 3203.4                 | 0.004        | 1.3         |
| $\nu_6$ (B <sub>1u</sub> )    | 969.6                  | 0.0          | 968.5                  | 0.0002       | -1.1        |
| $\nu_7$ (B <sub>2g</sub> )    | 904.4                  | 0.0          | 904.6                  | 0.004        | 0.2         |
| $\nu_8$ (B <sub>2g</sub> )    | 577.4                  | 0.0          | 571.1                  | 0.01         | -6.4        |
| $\nu_9$ (B <sub>2u</sub> )    | 1473.8                 | 0.0          | 1476.9                 | 0.02         | 3.1         |
| $\nu_{10}$ (B <sub>2u</sub> ) | 1155.3                 | 0.0          | 1155.6                 | 0.0004       | 0.3         |
| $\nu_{11}$ (E <sub>1g</sub> ) | 845.5                  | 0.0          | 848.1                  | 0.5          | 2.6         |
| $\nu_{12}$ (E <sub>1u</sub> ) | 3229.1                 | 28.3         | 3229.9                 | 20.3         | 0.8         |
| $\nu_{13}$ (E <sub>1u</sub> ) | 1469.3                 | 5.4          | 1467.3                 | 7.0          | -2.0        |
| $\nu_{14}$ (E <sub>1u</sub> ) | 1052.0                 | 5.2          | 1051.2                 | 4.5          | -0.8        |
| $\nu_{15}$ (E <sub>2g</sub> ) | 3213.0                 | 0.0          | 3214.2                 | 0.008        | 1.2         |
| $\nu_{16}$ (E <sub>2g</sub> ) | 1624.5                 | 0.0          | 1621.7                 | 0.02         | -2.8        |
| $\nu_{17}$ (E <sub>2g</sub> ) | 1183.1                 | 0.0          | 1183.0                 | 0.1          | -0.1        |
| $\nu_{18}$ (E <sub>2g</sub> ) | 594.9                  | 0.0          | 593.9                  | 0.003        | -1.1        |
| $\nu_{19}$ (E <sub>2u</sub> ) | 927.1                  | 0.0          | 928.1                  | 0.02         | 1.0         |
| $\nu_{20}$ (E <sub>2u</sub> ) | 394.8                  | 0.0          | 393.3                  | 0.01         | -1.5        |

Notes: Van der Waals vibrations: 57.7  $\text{cm}^{-1}$ , 0.4  $\text{km mol}^{-1}$ ; 40.0  $\text{cm}^{-1}$ , 0.01  $\text{km mol}^{-1}$ ; 38.4  $\text{cm}^{-1}$ , 0.01  $\text{km mol}^{-1}$ ; 20.3  $\text{cm}^{-1}$ , 0.02  $\text{km mol}^{-1}$ ; 8.7  $\text{cm}^{-1}$ , 0.01  $\text{km mol}^{-1}$ ; 1.0  $\text{cm}^{-1}$ , 0.0001  $\text{km mol}^{-1}$ .

**Table S3.** MP2/aug-cc-pVDZ vibrational frequencies, in  $\text{cm}^{-1}$ , and infrared intensities, in  $\text{km mol}^{-1}$ , for  $\text{CF}_3\text{I}$ -benzene.

| Mode                          | $\nu_{\text{monomer}}$ | IR Intensity | $\nu_{\text{complex}}$ | IR Intensity | $\Delta\nu$ |
|-------------------------------|------------------------|--------------|------------------------|--------------|-------------|
| CF <sub>3</sub> I             |                        |              |                        |              |             |
| $\nu_1$ (A <sub>1</sub> )     | 1060.0                 | 546.9        | 1063.4                 | 625.2        | 3.5         |
| $\nu_2$ (A <sub>1</sub> )     | 722.3                  | 34.4         | 719.6                  | 27.7         | -2.8        |
| $\nu_3$ (A <sub>1</sub> )     | 295.1                  | 0.3          | 293.3                  | 2.6          | -1.8        |
| $\nu_4$ (E)                   | 1162.0                 | 227.6        | 1151.8                 | 222.2        | -10.2       |
| $\nu_5$ (E)                   | 518.9                  | 0.5          | 517.9                  | 0.7          | -1.0        |
| $\nu_6$ (E)                   | 269.1                  | 0.03         | 269.5                  | 0.003        | 0.3         |
| benzene                       |                        |              |                        |              |             |
| $\nu_1$ (A <sub>1g</sub> )    | 3238.7                 | 0.0          | 3239.6                 | 0.9          | 0.9         |
| $\nu_2$ (A <sub>1g</sub> )    | 1007.1                 | 0.0          | 1005.3                 | 3.1          | -1.8        |
| $\nu_3$ (A <sub>2g</sub> )    | 1322.6                 | 0.0          | 1320.6                 | 0.001        | -2.0        |
| $\nu_4$ (A <sub>2u</sub> )    | 678.4                  | 115.9        | 683.5                  | 141.6        | 5.1         |
| $\nu_5$ (B <sub>1u</sub> )    | 3202.1                 | 0.0          | 3203.7                 | 0.01         | 1.6         |
| $\nu_6$ (B <sub>1u</sub> )    | 969.6                  | 0.0          | 967.6                  | 0.001        | -2.0        |
| $\nu_7$ (B <sub>2g</sub> )    | 904.4                  | 0.0          | 904.4                  | 0.03         | -0.1        |
| $\nu_8$ (B <sub>2g</sub> )    | 577.4                  | 0.0          | 566.7                  | 0.03         | -10.7       |
| $\nu_9$ (B <sub>2u</sub> )    | 1473.8                 | 0.0          | 1477.3                 | 0.05         | 3.5         |
| $\nu_{10}$ (B <sub>2u</sub> ) | 1155.3                 | 0.0          | 1155.8                 | 0.01         | 0.5         |
| $\nu_{11}$ (E <sub>1g</sub> ) | 845.5                  | 0.0          | 849.0                  | 1.1          | 3.5         |
| $\nu_{12}$ (E <sub>1u</sub> ) | 3229.1                 | 28.3         | 3230.2                 | 17.4         | 1.1         |
| $\nu_{13}$ (E <sub>1u</sub> ) | 1469.3                 | 5.4          | 1466.4                 | 7.4          | -2.9        |
| $\nu_{14}$ (E <sub>1u</sub> ) | 1052.0                 | 5.2          | 1050.8                 | 6.5          | -1.2        |
| $\nu_{15}$ (E <sub>2g</sub> ) | 3213.0                 | 0.0          | 3214.6                 | 0.02         | 1.7         |
| $\nu_{16}$ (E <sub>2g</sub> ) | 1624.5                 | 0.0          | 1620.6                 | 0.1          | -3.8        |
| $\nu_{17}$ (E <sub>2g</sub> ) | 1183.1                 | 0.0          | 1182.9                 | 0.05         | -0.2        |
| $\nu_{18}$ (E <sub>2g</sub> ) | 594.9                  | 0.0          | 593.5                  | 0.01         | -1.5        |
| $\nu_{19}$ (E <sub>2u</sub> ) | 927.1                  | 0.0          | 928.3                  | 0.1          | 1.2         |
| $\nu_{20}$ (E <sub>2u</sub> ) | 394.8                  | 0.0          | 392.5                  | 0.03         | -2.3        |

Notes: Van der Waals vibrations: 62.3  $\text{cm}^{-1}$ , 1.1  $\text{km mol}^{-1}$ ; 41.8  $\text{cm}^{-1}$ , 0.01  $\text{km mol}^{-1}$ ; 39.3  $\text{cm}^{-1}$ , 0.03  $\text{km mol}^{-1}$ ; 22.2  $\text{cm}^{-1}$ , 0.03  $\text{km mol}^{-1}$ ; 8.9  $\text{cm}^{-1}$ , 0.004  $\text{km mol}^{-1}$ ; 0.1  $\text{cm}^{-1}$ , 0.0  $\text{km mol}^{-1}$ .

**Table S4.** MP2/aug-cc-pVDZ vibrational frequencies, in  $\text{cm}^{-1}$ , and infrared intensities, in  $\text{km mol}^{-1}$ , for  $\text{CF}_3\text{Cl}$ -toluene.

| Mode                         | $\nu_{\text{monomer}}$ | IR Intensity | $\nu_{\text{complex}}$ | IR Intensity | $\Delta\nu$ |
|------------------------------|------------------------|--------------|------------------------|--------------|-------------|
| CF <sub>3</sub> Cl           |                        |              |                        |              |             |
| $\nu_1$ (A <sub>1</sub> )    | 1097.0                 | 469.7        | 1097.9                 | 566.5        | 1.0         |
| $\nu_2$ (A <sub>1</sub> )    | 765.0                  | 24.5         | 762.7                  | 21.3         | -2.2        |
| $\nu_3$ (A <sub>1</sub> )    | 480.3                  | 0.1          | 481.2                  | 1.6          | 0.9         |
| $\nu_4$ (E)                  | 1192.2                 | 282.1        | 1183.0                 | 260.4        | -9.2        |
| $\nu_5$ (E)                  | 546.0                  | 1.4          | 545.4                  | 1.5          | -0.5        |
| $\nu_6$ (E)                  | 347.2                  | 0.002        | 348.1                  | 0.01         | 0.9         |
| toluene                      |                        |              |                        |              |             |
| $\nu_1$ (A <sub>1</sub> )    | 3234.3                 | 12.0         | 3235.0                 | 10.4         | 0.8         |
| $\nu_2$ (A <sub>1</sub> )    | 3212.1                 | 3.8          | 3213.1                 | 2.9          | 0.9         |
| $\nu_3$ (A <sub>1</sub> )    | 3194.5                 | 7.2          | 3196.6                 | 6.1          | 2.1         |
| $\nu_4$ (A <sub>1</sub> )    | 1641.4                 | 5.9          | 1639.0                 | 5.3          | -2.4        |
| $\nu_5$ (A <sub>1</sub> )    | 1497.5                 | 10.5         | 1495.8                 | 11.1         | -1.7        |
| $\nu_6$ (A <sub>1</sub> )    | 1238.1                 | 0.3          | 1237.8                 | 0.1          | -0.3        |
| $\nu_7$ (A <sub>1</sub> )    | 1187.3                 | 0.1          | 1187.2                 | 0.2          | -0.1        |
| $\nu_8$ (A <sub>1</sub> )    | 1041.5                 | 3.2          | 1041.2                 | 2.1          | -0.3        |
| $\nu_9$ (A <sub>1</sub> )    | 992.0                  | 0.3          | 992.4                  | 0.4          | 0.5         |
| $\nu_{10}$ (A <sub>1</sub> ) | 790.6                  | 0.2          | 790.3                  | 0.8          | -0.2        |
| $\nu_{11}$ (A <sub>1</sub> ) | 512.8                  | 0.4          | 513.1                  | 0.5          | 0.2         |
| $\nu_{12}$ (A <sub>2</sub> ) | 931.8                  | 0.01         | 933.2                  | 0.01         | 1.4         |
| $\nu_{13}$ (A <sub>2</sub> ) | 837.2                  | 0.001        | 839.1                  | 0.1          | 1.9         |
| $\nu_{14}$ (A <sub>2</sub> ) | 400.4                  | 0.01         | 397.9                  | 0.01         | -2.5        |
| $\nu_{15}$ (B <sub>1</sub> ) | 914.8                  | 0.004        | 916.6                  | 0.03         | 1.9         |
| $\nu_{16}$ (B <sub>1</sub> ) | 878.9                  | 0.3          | 881.4                  | 0.8          | 2.5         |
| $\nu_{17}$ (B <sub>1</sub> ) | 721.2                  | 77.8         | 722.5                  | 82.0         | 1.3         |
| $\nu_{18}$ (B <sub>1</sub> ) | 609.8                  | 1.7          | 610.0                  | 2.5          | 0.2         |
| $\nu_{19}$ (B <sub>1</sub> ) | 458.5                  | 8.3          | 457.7                  | 10.0         | -0.9        |
| $\nu_{20}$ (B <sub>1</sub> ) | 210.1                  | 2.0          | 211.5                  | 3.2          | 1.3         |
| $\nu_{21}$ (B <sub>2</sub> ) | 3221.2                 | 26.6         | 3222.0                 | 21.3         | 0.9         |
| $\nu_{22}$ (B <sub>2</sub> ) | 3198.6                 | 6.1          | 3198.1                 | 4.7          | -0.5        |
| $\nu_{23}$ (B <sub>2</sub> ) | 1619.2                 | 0.03         | 1616.6                 | 0.01         | -2.6        |
| $\nu_{24}$ (B <sub>2</sub> ) | 1477.0                 | 1.5          | 1478.3                 | 3.3          | 1.3         |
| $\nu_{25}$ (B <sub>2</sub> ) | 1436.4                 | 0.8          | 1434.0                 | 1.3          | -2.3        |
| $\nu_{26}$ (B <sub>2</sub> ) | 1314.5                 | 0.2          | 1311.9                 | 0.1          | -2.6        |
| $\nu_{27}$ (B <sub>2</sub> ) | 1162.8                 | 0.003        | 1163.0                 | 0.01         | 0.2         |
| $\nu_{28}$ (B <sub>2</sub> ) | 1100.1                 | 5.7          | 1100.0                 | 13.9         | -0.1        |
| $\nu_{29}$ (B <sub>2</sub> ) | 614.0                  | 0.1          | 612.8                  | 0.1          | -1.2        |
| $\nu_{30}$ (B <sub>2</sub> ) | 337.3                  | 0.3          | 337.9                  | 0.2          | 0.7         |
| $\nu_{31}$ (A <sub>1</sub> ) | 3061.1                 | 27.5         | 3057.5                 | 24.1         | -3.7        |
| $\nu_{32}$ (A <sub>1</sub> ) | 1397.0                 | 0.4          | 1397.3                 | 0.9          | 0.2         |
| $\nu_{33}$ (A <sub>2</sub> ) | 43.2                   | 0.1          | 40.2                   | 0.01         | -3.0        |
| $\nu_{34}$ (E)               | 3154.4                 | 12.5         | 3153.1                 | 12.6         | -1.3        |
| $\nu_{35}$ (E)               | 1485.6                 | 7.8          | 1484.0                 | 6.5          | -1.6        |
| $\nu_{36}$ (E)               | 1021.2                 | 1.9          | 1018.2                 | 4.4          | -3.0        |

Notes: Van der Waals vibrations: 54.9  $\text{cm}^{-1}$ , 0.1  $\text{km mol}^{-1}$ ; 32.7  $\text{cm}^{-1}$ , 0.04  $\text{km mol}^{-1}$ ; 19.8  $\text{cm}^{-1}$ , 0.05  $\text{km mol}^{-1}$ ; 12.1  $\text{cm}^{-1}$ , 0.02  $\text{km mol}^{-1}$ ; 3.6  $\text{cm}^{-1}$ , 0.1  $\text{km mol}^{-1}$ ; 0.7  $\text{cm}^{-1}$ , 0.03  $\text{km mol}^{-1}$ .

**Table S5.** MP2/aug-cc-pVDZ vibrational frequencies, in  $\text{cm}^{-1}$ , and infrared intensities, in  $\text{km mol}^{-1}$ , for  $\text{CF}_3\text{Br}$ -toluene.

| Mode                                     | $\nu_{\text{monomer}}$ | IR Intensity | $\nu_{\text{complex}}$ | IR Intensity | $\Delta\nu$ |
|------------------------------------------|------------------------|--------------|------------------------|--------------|-------------|
| <b><math>\text{CF}_3\text{Br}</math></b> |                        |              |                        |              |             |
| $\nu_1 (\text{A}_1)$                     | 1078.6                 | 496.1        | 1079.6                 | 596.5        | 1.0         |
| $\nu_2 (\text{A}_1)$                     | 739.4                  | 29.7         | 736.3                  | 23.4         | -3.1        |
| $\nu_3 (\text{A}_1)$                     | 361.5                  | 0.04         | 359.5                  | 1.3          | -2.0        |
| $\nu_4 (\text{E})$                       | 1178.8                 | 254.7        | 1169.7                 | 240.9        | -9.1        |
| $\nu_5 (\text{E})$                       | 531.3                  | 0.9          | 530.4                  | 1.0          | -0.9        |
| $\nu_6 (\text{E})$                       | 305.8                  | 0.01         | 306.2                  | 0.01         | 0.5         |
| <b>toluene</b>                           |                        |              |                        |              |             |
| $\nu_1 (\text{A}_1)$                     | 3234.3                 | 12.0         | 3235.6                 | 9.9          | 1.3         |
| $\nu_2 (\text{A}_1)$                     | 3212.1                 | 3.8          | 3213.6                 | 2.4          | 1.5         |
| $\nu_3 (\text{A}_1)$                     | 3194.5                 | 7.2          | 3196.6                 | 5.6          | 2.2         |
| $\nu_4 (\text{A}_1)$                     | 1641.4                 | 5.9          | 1638.3                 | 4.9          | -3.1        |
| $\nu_5 (\text{A}_1)$                     | 1497.5                 | 10.5         | 1495.7                 | 10.0         | -1.8        |
| $\nu_6 (\text{A}_1)$                     | 1238.1                 | 0.3          | 1237.8                 | 0.1          | -0.3        |
| $\nu_7 (\text{A}_1)$                     | 1187.3                 | 0.1          | 1187.2                 | 0.2          | -0.1        |
| $\nu_8 (\text{A}_1)$                     | 1041.5                 | 3.2          | 1040.9                 | 2.6          | -0.6        |
| $\nu_9 (\text{A}_1)$                     | 992.0                  | 0.3          | 991.5                  | 0.4          | -0.4        |
| $\nu_{10} (\text{A}_1)$                  | 790.6                  | 0.2          | 789.7                  | 0.6          | -0.9        |
| $\nu_{11} (\text{A}_1)$                  | 512.8                  | 0.4          | 512.4                  | 0.4          | -0.5        |
| $\nu_{12} (\text{A}_2)$                  | 931.8                  | 0.01         | 933.1                  | 0.1          | 1.3         |
| $\nu_{13} (\text{A}_2)$                  | 837.2                  | 0.001        | 840.0                  | 0.4          | 2.8         |
| $\nu_{14} (\text{A}_2)$                  | 400.4                  | 0.01         | 398.4                  | 0.1          | -1.9        |
| $\nu_{15} (\text{B}_1)$                  | 914.8                  | 0.004        | 916.2                  | 0.03         | 1.4         |
| $\nu_{16} (\text{B}_1)$                  | 878.9                  | 0.3          | 881.7                  | 1.4          | 2.8         |
| $\nu_{17} (\text{B}_1)$                  | 721.2                  | 77.8         | 723.4                  | 87.8         | 2.2         |
| $\nu_{18} (\text{B}_1)$                  | 609.8                  | 1.7          | 605.7                  | 2.0          | -4.1        |
| $\nu_{19} (\text{B}_1)$                  | 458.5                  | 8.3          | 458.2                  | 11.0         | -0.3        |
| $\nu_{20} (\text{B}_1)$                  | 210.1                  | 2.0          | 214.4                  | 3.9          | 4.3         |
| $\nu_{21} (\text{B}_2)$                  | 3221.2                 | 26.6         | 3222.5                 | 19.4         | 1.4         |
| $\nu_{22} (\text{B}_2)$                  | 3198.6                 | 6.1          | 3198.7                 | 4.4          | 0.1         |
| $\nu_{23} (\text{B}_2)$                  | 1619.2                 | 0.03         | 1616.2                 | 0.03         | -3.0        |
| $\nu_{24} (\text{B}_2)$                  | 1477.0                 | 1.5          | 1478.9                 | 3.2          | 1.9         |
| $\nu_{25} (\text{B}_2)$                  | 1436.4                 | 0.8          | 1434.6                 | 1.6          | -1.7        |
| $\nu_{26} (\text{B}_2)$                  | 1314.5                 | 0.2          | 1313.4                 | 0.2          | -1.2        |
| $\nu_{27} (\text{B}_2)$                  | 1162.8                 | 0.003        | 1163.4                 | 0.1          | 0.6         |
| $\nu_{28} (\text{B}_2)$                  | 1100.1                 | 5.7          | 1099.9                 | 5.1          | -0.3        |
| $\nu_{29} (\text{B}_2)$                  | 614.0                  | 0.1          | 612.8                  | 0.04         | -1.2        |
| $\nu_{30} (\text{B}_2)$                  | 337.3                  | 0.3          | 337.2                  | 0.3          | -0.1        |
| $\nu_{31} (\text{A}_1)$                  | 3061.1                 | 27.5         | 3059.2                 | 22.6         | -1.9        |
| $\nu_{32} (\text{A}_1)$                  | 1397.0                 | 0.4          | 1397.3                 | 1.2          | 0.3         |
| $\nu_{33} (\text{A}_2)$                  | 43.2                   | 0.1          | 47.2                   | 0.1          | 4.0         |
| $\nu_{34} (\text{E})$                    | 3154.4                 | 12.5         | 3153.9                 | 11.9         | -0.5        |
| $\nu_{35} (\text{E})$                    | 1485.6                 | 7.8          | 1484.4                 | 8.2          | -1.1        |
| $\nu_{36} (\text{E})$                    | 1021.2                 | 1.9          | 1020.1                 | 4.4          | -1.0        |

Notes: Van der Waals vibrations:  $57.8 \text{ cm}^{-1}$ ,  $0.3 \text{ km mol}^{-1}$ ;  $39.6 \text{ cm}^{-1}$ ,  $0.1 \text{ km mol}^{-1}$ ;  $31.8 \text{ cm}^{-1}$ ,  $0.01 \text{ km mol}^{-1}$ ;  $21.1 \text{ cm}^{-1}$ ,  $0.05 \text{ km mol}^{-1}$ ;  $11.6 \text{ cm}^{-1}$ ,  $0.02 \text{ km mol}^{-1}$ ;  $1.1 \text{ cm}^{-1}$ ,  $0.003 \text{ km mol}^{-1}$ .

**Table S6.** MP2/aug-cc-pVDZ vibrational frequencies, in  $\text{cm}^{-1}$ , and infrared intensities, in  $\text{km mol}^{-1}$ , for  $\text{CF}_3\text{I}$ -toluene.

| Mode                                    | $\nu_{\text{monomer}}$ | IR Intensity | $\nu_{\text{complex}}$ | IR Intensity | $\Delta\nu$ |
|-----------------------------------------|------------------------|--------------|------------------------|--------------|-------------|
| <b><math>\text{CF}_3\text{I}</math></b> |                        |              |                        |              |             |
| $\nu_1 (\text{A}_1)$                    | 1060.0                 | 546.9        | 1063.4                 | 640.9        | 3.5         |
| $\nu_2 (\text{A}_1)$                    | 722.3                  | 34.4         | 719.0                  | 43.1         | -3.4        |
| $\nu_3 (\text{A}_1)$                    | 295.1                  | 0.3          | 292.3                  | 3.2          | -2.8        |
| $\nu_4 (\text{E})$                      | 1162.0                 | 227.6        | 1151.1                 | 220.2        | -10.9       |
| $\nu_5 (\text{E})$                      | 518.9                  | 0.5          | 517.7                  | 0.7          | -1.2        |
| $\nu_6 (\text{E})$                      | 269.1                  | 0.03         | 269.3                  | 0.004        | 0.2         |
| <b>toluene</b>                          |                        |              |                        |              |             |
| $\nu_1 (\text{A}_1)$                    | 3234.3                 | 12.0         | 3236.2                 | 9.2          | 1.9         |
| $\nu_2 (\text{A}_1)$                    | 3212.1                 | 3.8          | 3214.2                 | 1.9          | 2.1         |
| $\nu_3 (\text{A}_1)$                    | 3194.5                 | 7.2          | 3197.4                 | 5.0          | 2.9         |
| $\nu_4 (\text{A}_1)$                    | 1641.4                 | 5.9          | 1637.1                 | 4.6          | -4.3        |
| $\nu_5 (\text{A}_1)$                    | 1497.5                 | 10.5         | 1495.1                 | 9.1          | -2.3        |
| $\nu_6 (\text{A}_1)$                    | 1238.1                 | 0.3          | 1237.6                 | 0.2          | -0.5        |
| $\nu_7 (\text{A}_1)$                    | 1187.3                 | 0.1          | 1187.1                 | 0.3          | -0.2        |
| $\nu_8 (\text{A}_1)$                    | 1041.5                 | 3.2          | 1040.7                 | 2.2          | -0.8        |
| $\nu_9 (\text{A}_1)$                    | 992.0                  | 0.3          | 991.2                  | 0.7          | -0.8        |
| $\nu_{10} (\text{A}_1)$                 | 790.6                  | 0.2          | 789.1                  | 0.6          | -1.5        |
| $\nu_{11} (\text{A}_1)$                 | 512.8                  | 0.4          | 511.9                  | 0.4          | -0.9        |
| $\nu_{12} (\text{A}_2)$                 | 931.8                  | 0.01         | 933.5                  | 0.3          | 1.6         |
| $\nu_{13} (\text{A}_2)$                 | 837.2                  | 0.001        | 841.4                  | 1.1          | 4.2         |
| $\nu_{14} (\text{A}_2)$                 | 400.4                  | 0.01         | 398.2                  | 0.2          | -2.2        |
| $\nu_{15} (\text{B}_1)$                 | 914.8                  | 0.004        | 916.6                  | 0.04         | 1.9         |
| $\nu_{16} (\text{B}_1)$                 | 878.9                  | 0.3          | 882.9                  | 2.5          | 3.9         |
| $\nu_{17} (\text{B}_1)$                 | 721.2                  | 77.8         | 724.7                  | 74.1         | 3.5         |
| $\nu_{18} (\text{B}_1)$                 | 609.8                  | 1.7          | 602.3                  | 1.7          | -7.5        |
| $\nu_{19} (\text{B}_1)$                 | 458.5                  | 8.3          | 457.5                  | 11.7         | -1.0        |
| $\nu_{20} (\text{B}_1)$                 | 210.1                  | 2.0          | 215.6                  | 5.5          | 5.4         |
| $\nu_{21} (\text{B}_2)$                 | 3221.2                 | 26.6         | 3223.0                 | 16.8         | 1.8         |
| $\nu_{22} (\text{B}_2)$                 | 3198.6                 | 6.1          | 3198.5                 | 3.7          | -0.1        |
| $\nu_{23} (\text{B}_2)$                 | 1619.2                 | 0.03         | 1615.3                 | 0.1          | -3.9        |
| $\nu_{24} (\text{B}_2)$                 | 1477.0                 | 1.5          | 1478.9                 | 3.4          | 1.9         |
| $\nu_{25} (\text{B}_2)$                 | 1436.4                 | 0.8          | 1434.1                 | 1.8          | -2.3        |
| $\nu_{26} (\text{B}_2)$                 | 1314.5                 | 0.2          | 1313.3                 | 0.3          | -1.2        |
| $\nu_{27} (\text{B}_2)$                 | 1162.8                 | 0.003        | 1163.8                 | 0.0          | 1.0         |
| $\nu_{28} (\text{B}_2)$                 | 1100.1                 | 5.7          | 1099.7                 | 5.0          | -0.5        |
| $\nu_{29} (\text{B}_2)$                 | 614.0                  | 0.1          | 612.4                  | 0.02         | -1.5        |
| $\nu_{30} (\text{B}_2)$                 | 337.3                  | 0.3          | 336.9                  | 0.2          | -0.4        |
| $\nu_{31} (\text{A}_1)$                 | 3061.1                 | 27.5         | 3060.0                 | 20.5         | -1.1        |
| $\nu_{32} (\text{A}_1)$                 | 1397.0                 | 0.4          | 1397.4                 | 1.6          | 0.4         |
| $\nu_{33} (\text{A}_2)$                 | 43.2                   | 0.1          | 56.1                   | 0.2          | 12.9        |
| $\nu_{34} (\text{E})$                   | 3154.4                 | 12.5         | 3154.5                 | 11.1         | 0.1         |
| $\nu_{35} (\text{E})$                   | 1485.6                 | 7.8          | 1484.3                 | 10.0         | -1.3        |
| $\nu_{36} (\text{E})$                   | 1021.2                 | 1.9          | 1020.3                 | 6.1          | -0.9        |

Notes: Van der Waals vibrations:  $61.3 \text{ cm}^{-1}$ ,  $1.0 \text{ km mol}^{-1}$ ;  $42.3 \text{ cm}^{-1}$ ,  $0.05 \text{ km mol}^{-1}$ ;  $35.2 \text{ cm}^{-1}$ ,  $0.03 \text{ km mol}^{-1}$ ;  $23.6 \text{ cm}^{-1}$ ,  $0.04 \text{ km mol}^{-1}$ ;  $13.6 \text{ cm}^{-1}$ ,  $0.02 \text{ km mol}^{-1}$ ;  $0.9 \text{ cm}^{-1}$ ,  $0.002 \text{ km mol}^{-1}$ .

**Table S7.** Comparison of the experimentally observed frequencies of toluene in LKr at 120 K with literature data <sup>a</sup> for the vapor and liquid phases and with the harmonic vibrational frequencies derived at the MP2/aug-cc-PVDZ and MP2/aug-cc-pVTZ levels.

| Assign     | Sym            | Gas       | Liquid |        | LKr    |        | Calc   |        |
|------------|----------------|-----------|--------|--------|--------|--------|--------|--------|
|            |                | IR        | Raman  | IR     | Raman  | IR     | MP2/DZ | MP2/TZ |
| $\nu_{21}$ | B <sub>2</sub> | 3096      |        | 3086.4 |        | 3092.9 | 3221.2 | 3212.9 |
| $\nu_1$    | A <sub>1</sub> | 3073      | 3065   | 3062.1 | 3072.5 | 3072.2 | 3234.3 | 3230.7 |
| $\nu_2$    | A <sub>1</sub> |           | 3055   | 3055   | 3060.7 | 3061.1 | 3212.1 | 3202.8 |
| $\nu_3$    | A <sub>1</sub> |           | 3038   |        | 3045.5 | 3046.2 | 3194.5 | 3180.5 |
| $\nu_{22}$ | B <sub>2</sub> | 3035      |        | 3027.0 |        | 3032.4 | 3198.6 | 3185.0 |
| $\nu_{34}$ | E              | 2960–2920 |        | 2950   | 2954.0 | 2954.7 | 3154.4 | 3153.5 |
| $\nu_{31}$ | A <sub>1</sub> | 2960–2920 | 2920   | 2919.9 | 2923.5 | 2923.1 | 3061.1 | 3074.7 |
| $\nu_4$    | A <sub>1</sub> | 1609      | 1604   | 1604.6 | 1608.0 | 1607.8 | 1641.4 | 1657.8 |
| $\nu_{23}$ | B <sub>2</sub> |           | 1585   | 1586.7 | 1567.5 | 1586.9 | 1619.2 | 1635.8 |
| $\nu_5$    | A <sub>1</sub> | 1500      |        | 1495.7 | 1498.2 | 1497.4 | 1497.5 | 1531.0 |
| $\nu_{35}$ | E              | 1463      |        | 1460.3 |        | 1466.9 | 1485.6 | 1519.1 |
| $\nu_{24}$ | B <sub>2</sub> |           | 1442   |        | 1440.9 | 1441.4 | 1477.0 | 1482.9 |
| $\nu_{32}$ | A <sub>1</sub> | 1384      | 1378   | 1378.9 | 1380.5 | 1380.1 | 1397.0 | 1423.4 |
| $\nu_{25}$ | B <sub>2</sub> |           | 1332   | 1332.0 | 1332.4 | 1331.8 | 1436.4 | 1462.8 |
| $\nu_{26}$ | B <sub>2</sub> | 1310      |        | 1312.7 | 1310.9 | 1310.8 | 1314.5 | 1345.0 |
| $\nu_6$    | A <sub>1</sub> | 1213      | 1210   | 1210.2 | 1212.1 | 1211.7 | 1238.1 | 1255.0 |
| $\nu_7$    | A <sub>1</sub> | 1179      | 1179   | 1178.6 | 1179.4 | 1179.0 | 1187.3 | 1198.6 |
| $\nu_{27}$ | B <sub>2</sub> |           | 1156   | 1155.9 | 1155.9 | 1155.6 | 1162.8 | 1171.4 |
| $\nu_{28}$ | B <sub>2</sub> | 1082      |        | 1081.4 | 1082.3 | 1081.6 | 1100.1 | 1114.2 |
| $\nu_{36}$ | E              |           |        | 1041.4 |        | 1040.7 | 1021.2 | 1045.0 |
| $\nu_8$    | A <sub>1</sub> | 1032      | 1031   | 1030.1 | 1032.0 | 1031.6 | 1041.5 | 1058.2 |
| $\nu_9$    | A <sub>1</sub> |           | 1003   | 1002.3 | 1002.9 | 1002.4 | 992.0  | 1029.1 |
| $\nu_{15}$ | B <sub>1</sub> |           |        | 980.7  |        |        | 914.8  | 1013.0 |
| $\nu_{12}$ | A <sub>2</sub> |           |        | 966.4  |        |        | 931.8  | 999.0  |
| $\nu_{16}$ | B <sub>1</sub> | 894       |        | 895.4  | 894.3  | 893.9  | 878.9  | 933.4  |
| $\nu_{13}$ | A <sub>2</sub> |           | 842    | 842.7  | 841.2  |        | 837.2  | 875.3  |
| $\nu_{10}$ | A <sub>1</sub> | 786       | 786    | 785.6  | 786.8  | 786.4  | 790.6  | 807.4  |
| $\nu_{17}$ | B <sub>1</sub> | 730       |        | 729.9  | 729.2  | 728.6  | 721.2  | 760.0  |
| $\nu_{18}$ | B <sub>1</sub> | 694       |        | 694.8  |        | 694.5  | 609.8  | 713.4  |
| $\nu_{29}$ | B <sub>2</sub> |           | 622    | 622.0  | 624.5  |        | 614.0  | 624.1  |
| $\nu_{11}$ | A <sub>1</sub> | 520       | 521    | 521.0  | 521.7  |        | 512.8  | 522.4  |
| $\nu_{19}$ | B <sub>1</sub> | 462       |        | 464.4  | 464.0  | 463.8  | 458.5  | 478.4  |
| $\nu_{14}$ | A <sub>2</sub> |           |        |        |        |        | 400.4  | 412.6  |
| $\nu_{30}$ | B <sub>2</sub> |           | 346    |        | 345.8  |        | 337.3  | 338.0  |
| $\nu_{20}$ | B <sub>1</sub> |           | 217    |        | 217.5  |        | 210.1  | 216.7  |
| $\nu_{33}$ | A <sub>2</sub> |           |        |        |        |        | 43.2   | 73.9   |

<sup>a</sup> J. E. Bertie, Y. Apelblat and C. D. Keefe. Infrared intensities of liquids XXV: Dielectric constants, molar polarizabilities and integrated intensities of liquid toluene at 25 °C between 4800 and 400 cm<sup>-1</sup>. *Journal of Molecular Structure* **2005**, 750, 78–93.
